# Supplementary material for: Comparative genomics of bdelloid rotifers: Insights from desiccating and nondesiccating species
Source: PubMed Central journal article supplement (PMC5916493; doi:10.1371/journal.pbio.2004830), 2018-04-24
Supplement: pbio.2004830.s010.pdf [file pbio.2004830.s010.pdf]

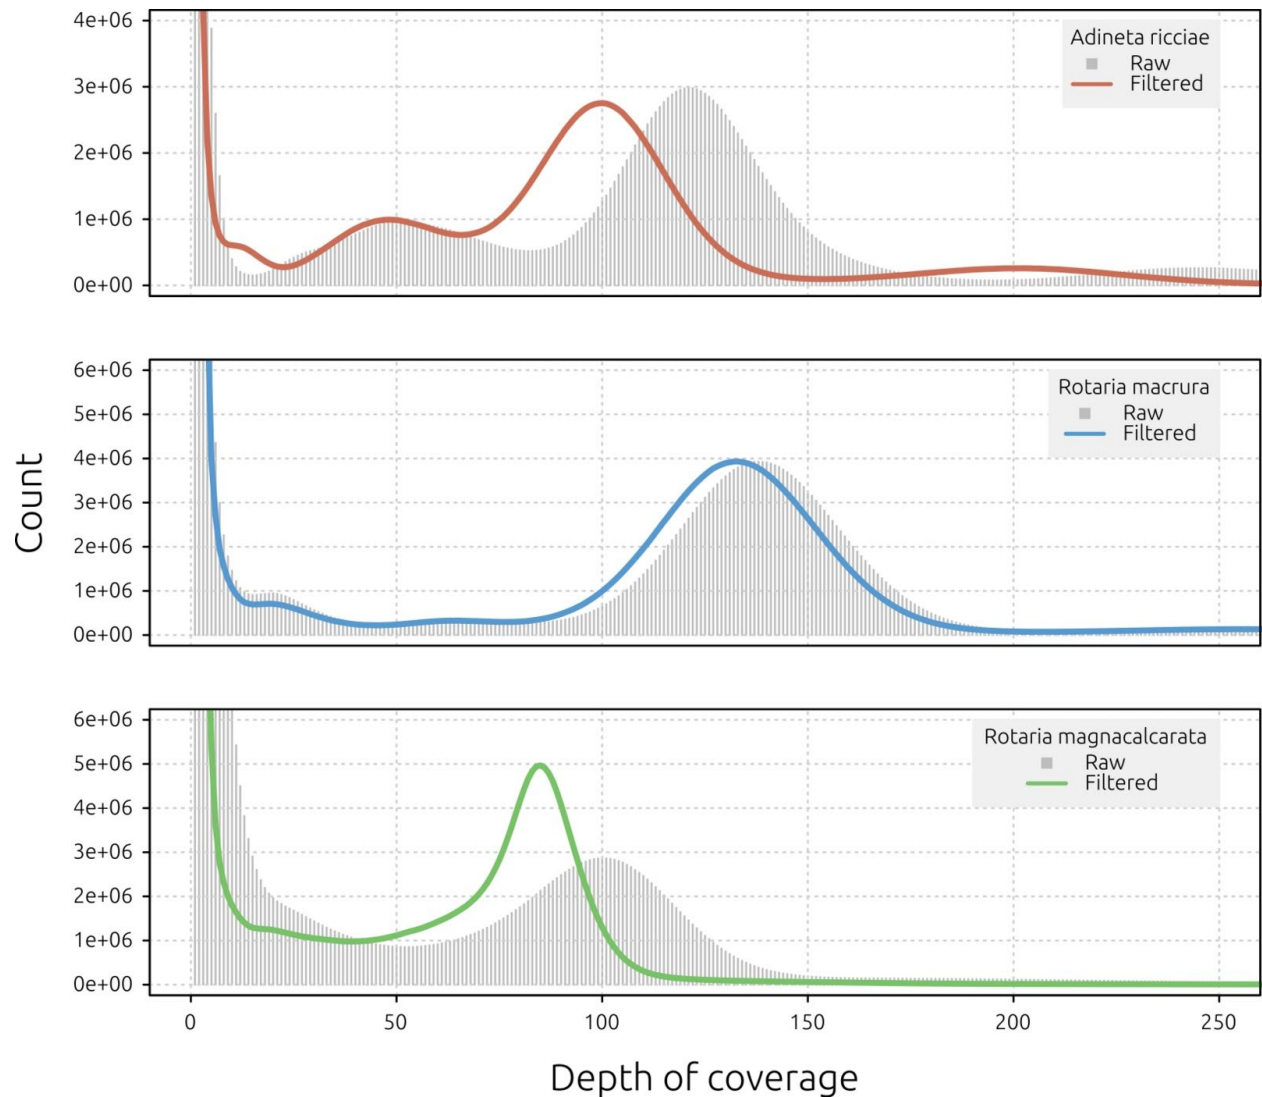

**SI Fig. Kmer spectra for raw and filtered sequence data.** Distributions show kmer depths ( $k = 31$ ) in raw (grey bars) and filtered (coloured lines) sequence data. Arrows indicate potential secondary and tertiary coverage peaks. The large number of low coverage kmers in the *Rotaria* datasets (particularly *R. magnacalcarata*) indicate substantial levels of polymorphism, most likely due to the sampling approach.
