# Supplementary material for: Comparative genomics of bdelloid rotifers: Insights from desiccating and nondesiccating species
Source: PubMed Central journal article supplement (PMC5916493; doi:10.1371/journal.pbio.2004830), 2018-04-24
Supplement: pbio.2004830.s011.pdf [file pbio.2004830.s011.pdf]

(A)

*i. A. ricciae* initial assembly

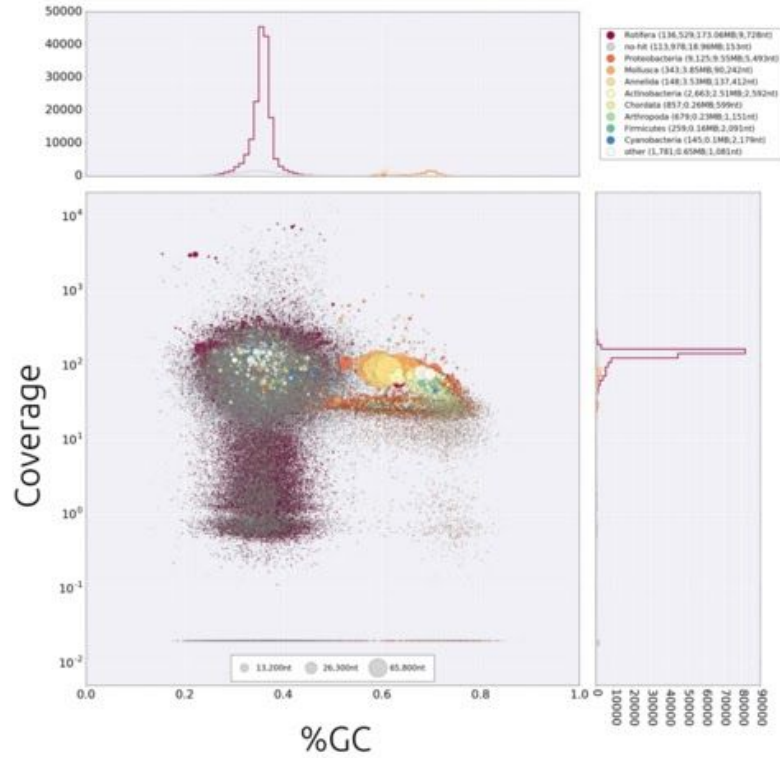

*ii. A. ricciae* final assembly

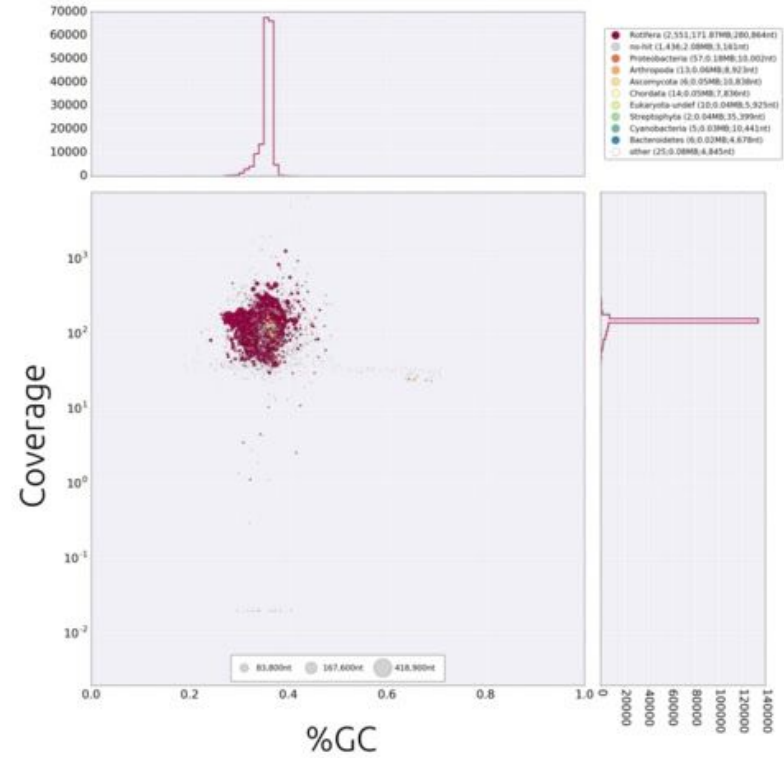

(B)

*i. R. macrura* initial assembly

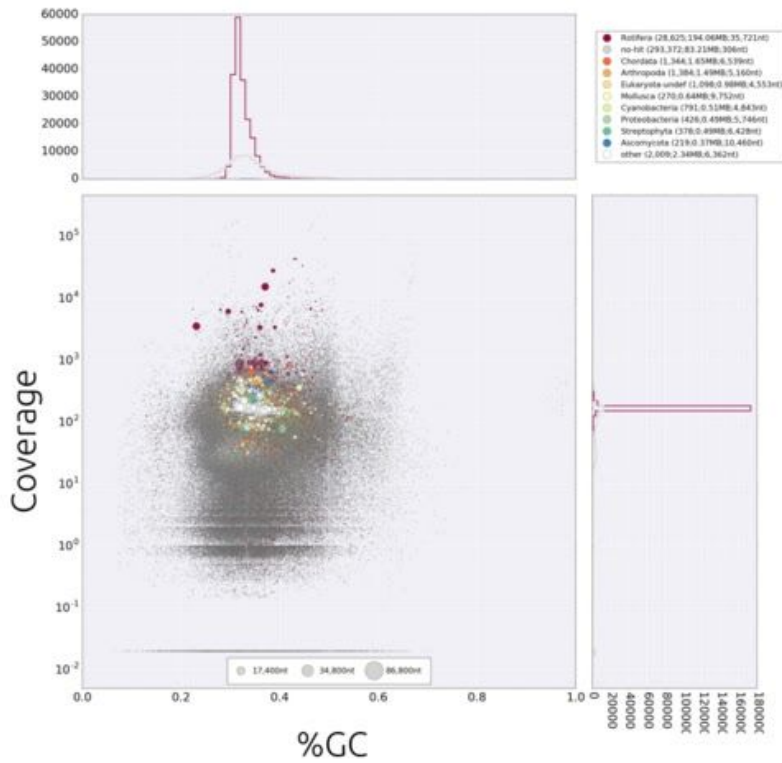

*ii. R. macrura* final assembly

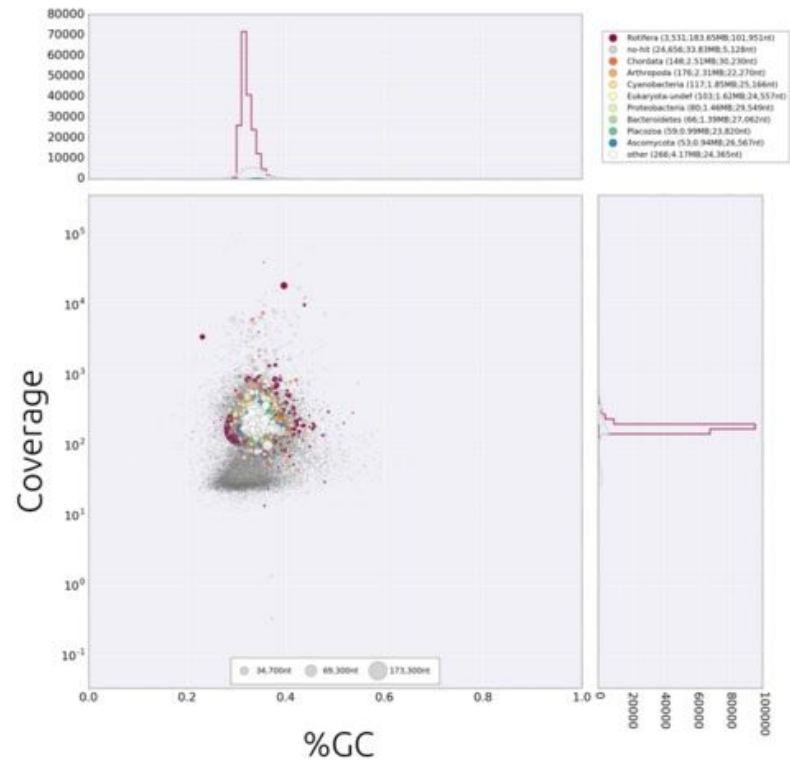

(C)

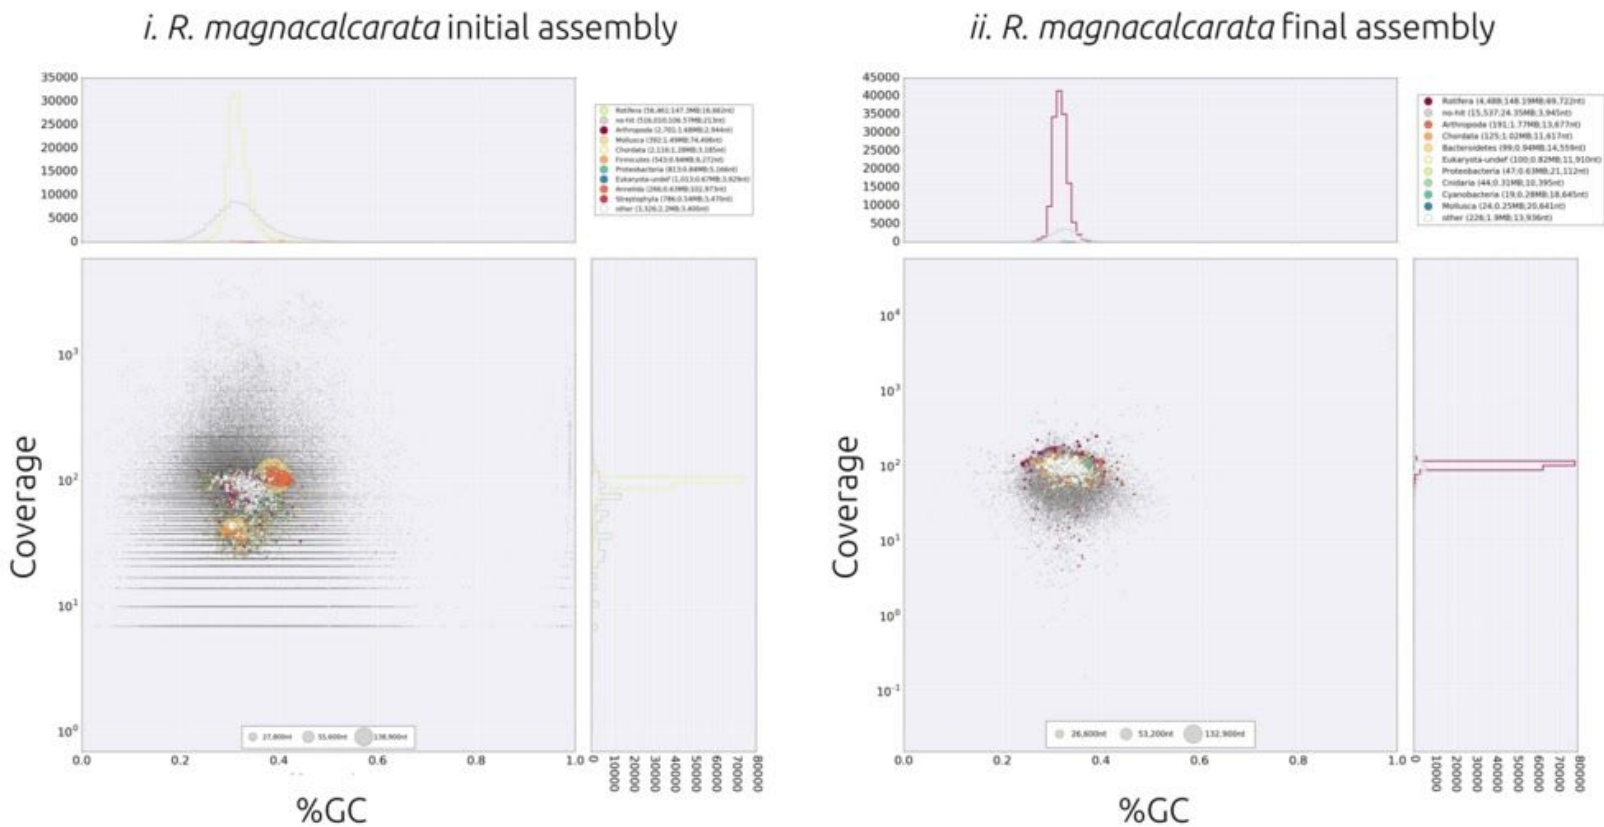

**S2 Fig. Taxon-annotated GC-Coverage plots for initial and final assemblies.** Initial draft assemblies for each species are shown in (i), final reference assemblies in (ii) for (A) *A. ricciae*, (B) *R. macrura* and (C) *R. magnacalcarata*. In each plot, circles represent assembly scaffolds with diameter proportional to the sequence length, positioned by %GC (X-axis) and average read coverage (Y-axis), and coloured by putative taxon of origin (see legends). Histograms in upper and right panels represent the total span of contigs/scaffolds in a given %GC or coverage bin.
