# Supplementary material for: Comparative genomics of bdelloid rotifers: Insights from desiccating and nondesiccating species
Source: PubMed Central journal article supplement (PMC5916493; doi:10.1371/journal.pbio.2004830), 2018-04-24
Supplement: pbio.2004830.s012.pdf [file pbio.2004830.s012.pdf]

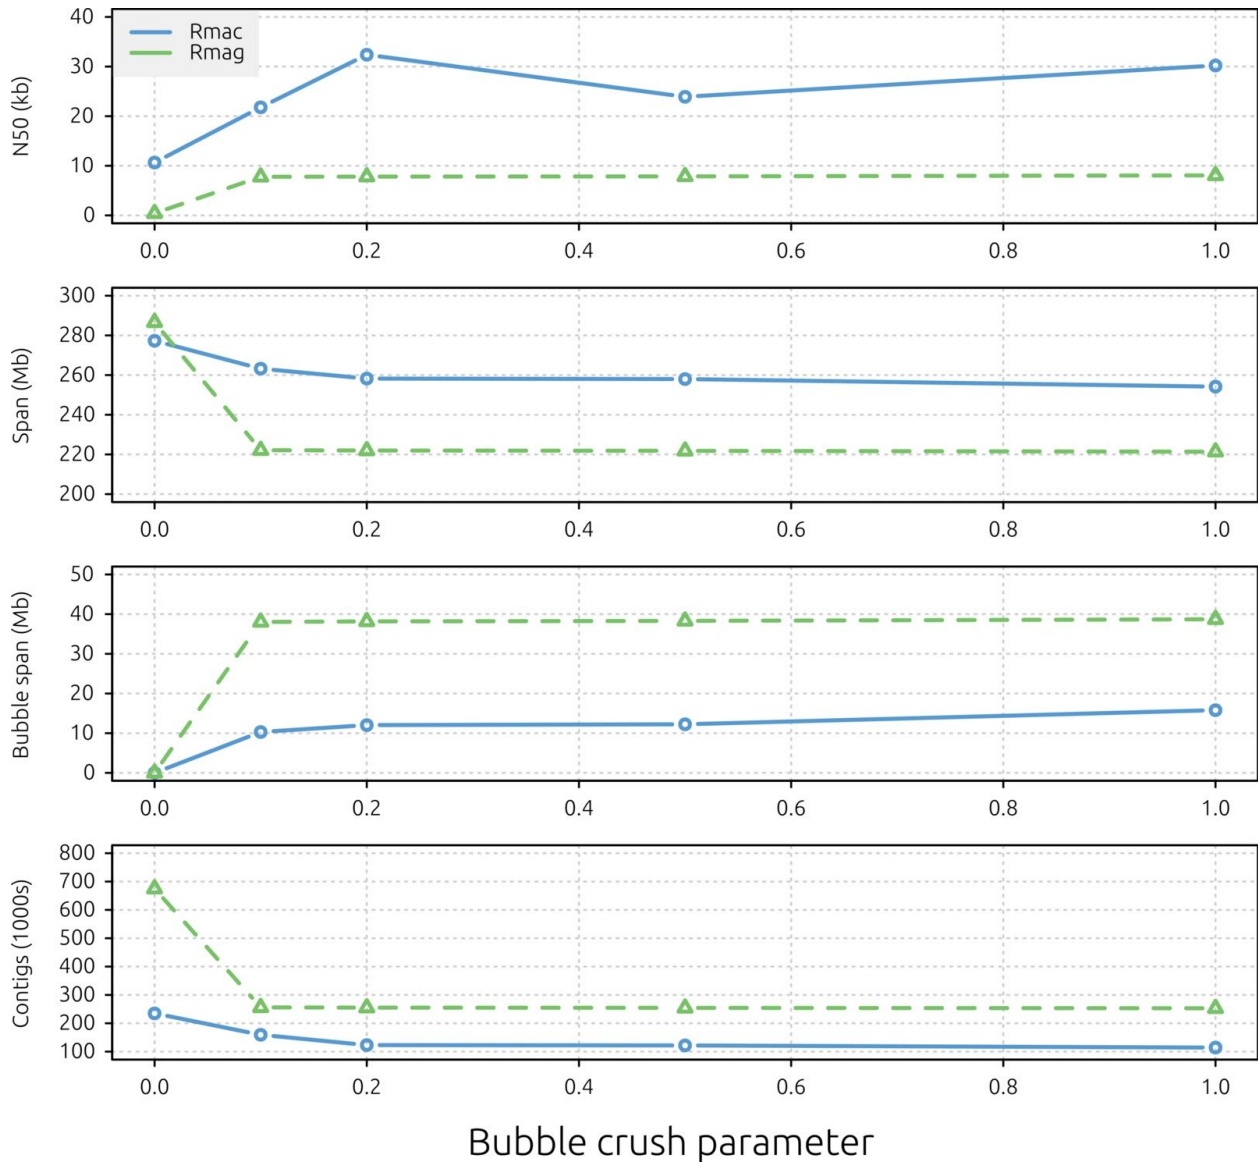

**S3 Fig. Effect of bubble crush on Platanus assembly.** Specifying the removal of polymorphic homologous regions, as identified by Platanus, results in substantial improvements to assembly contiguity by removing a large number of short contigs. Assembly improvements plateau at  $-u \geq 0.2$ . “Bubble span” (third panel) indicates the total length of removed sequences. Values are based on assembly statistics for contigs  $\leq 200$  bp length.
