# Supplementary material for: Comparative genomics of bdelloid rotifers: Insights from desiccating and nondesiccating species
Source: PubMed Central journal article supplement (PMC5916493; doi:10.1371/journal.pbio.2004830), 2018-04-24
Supplement: pbio.2004830.s013.pdf [file pbio.2004830.s013.pdf]

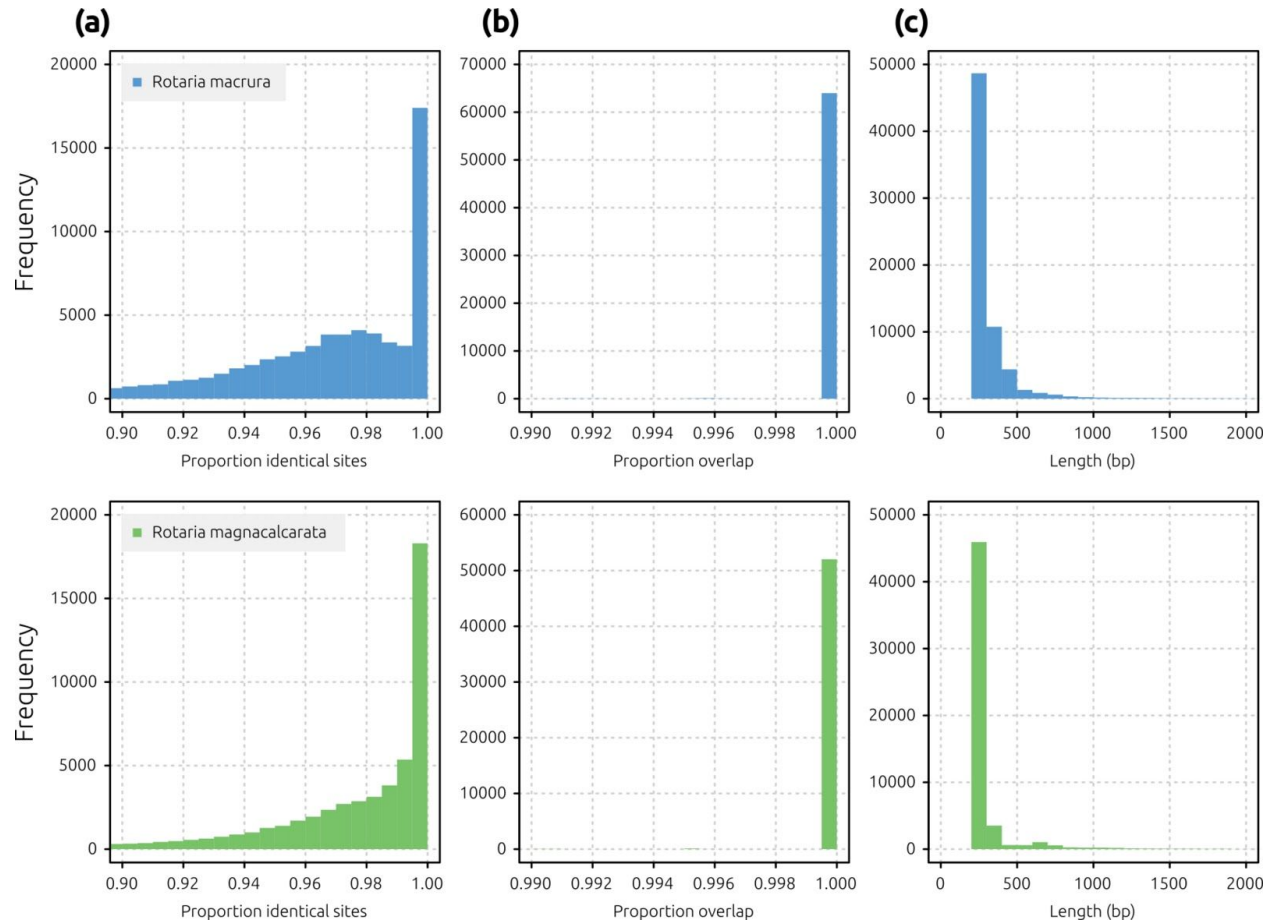

**S4 Fig. Effect of Redundans reduction.** (A) Identity distribution of discarded sequences to target sequences. (B) Proportion of overlap between discarded and target sequences. (C) Length distribution of discarded sequences.
