# Supplementary material for: Comparative genomics of bdelloid rotifers: Insights from desiccating and nondesiccating species
Source: PubMed Central journal article supplement (PMC5916493; doi:10.1371/journal.pbio.2004830), 2018-04-24
Supplement: pbio.2004830.s014.pdf [file pbio.2004830.s014.pdf]

(A)

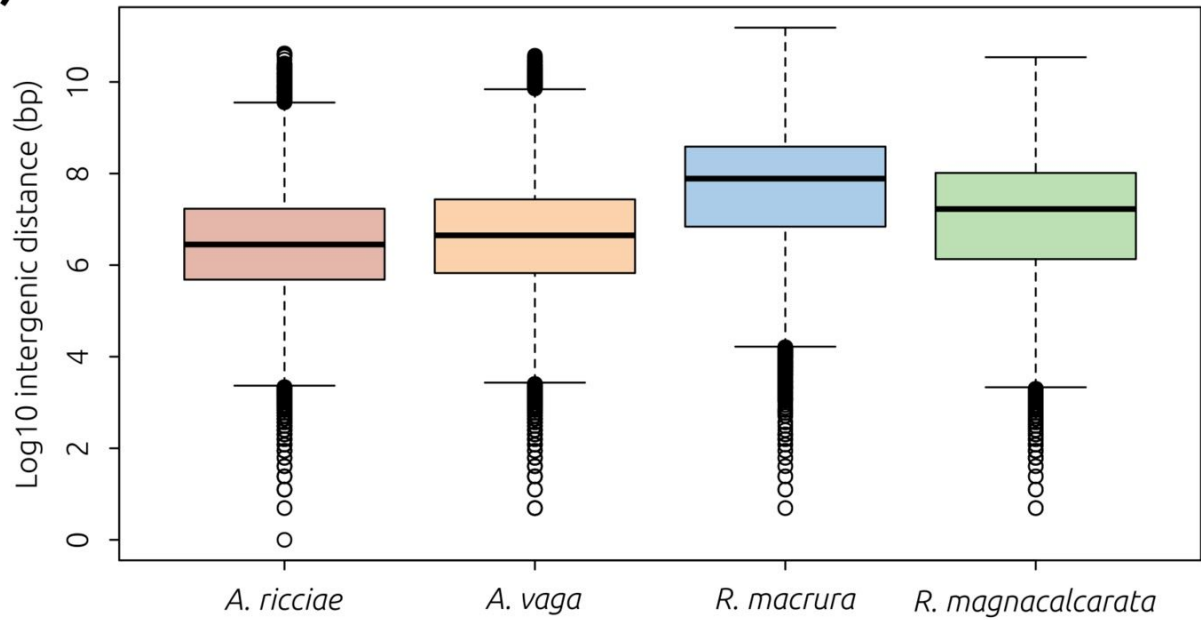

(B)

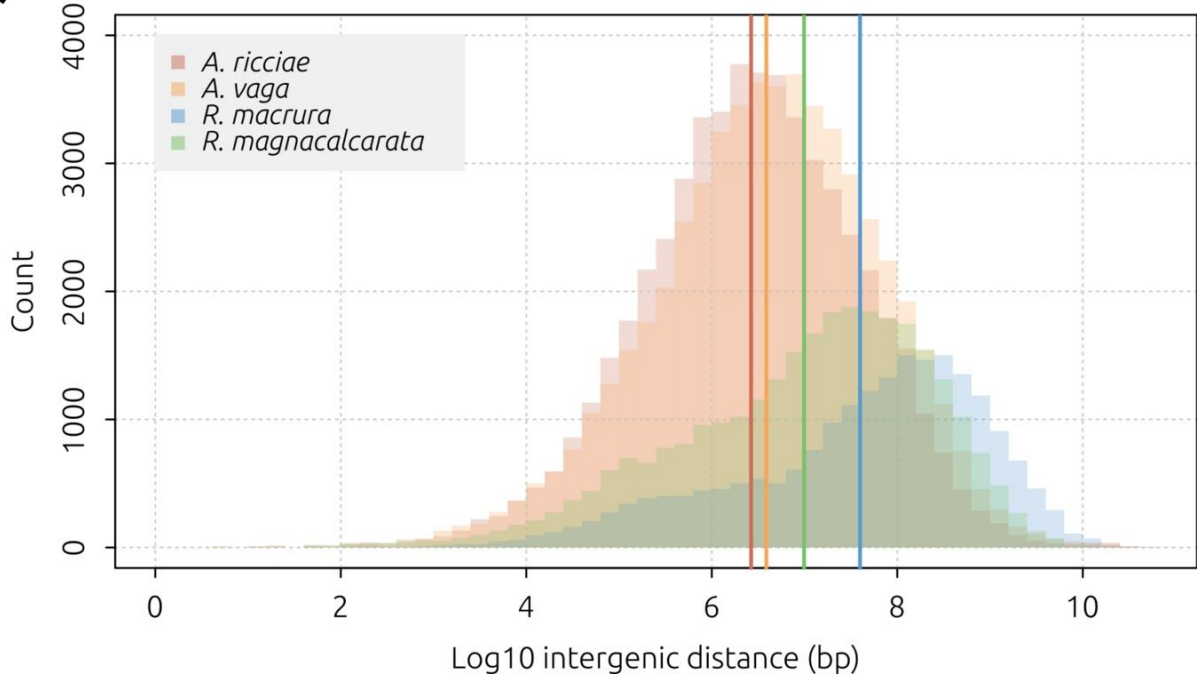

**S5 Fig. Distribution of intergenic distances between genes.** (A) Box-and-whisker plots showing interquartile range for intergenic distances between genes predicted on the same scaffolds in *A. ricciae* (red), *A. vaga* (orange), *R. macrura* (blue) and *R. magnacalcarata* (green). Median values are indicated by

a thick horizontal bar within boxes. Note  $\log_{10}$  scale on  $Y$ -axis. (B) Overlaid distributions of intergenic distances for all species. Vertical lines indicate mean distances. Note  $\log_{10}$  scale on  $X$ -axis.
