# Supplementary material for: Comparative genomics of bdelloid rotifers: Insights from desiccating and nondesiccating species
Source: PubMed Central journal article supplement (PMC5916493; doi:10.1371/journal.pbio.2004830), 2018-04-24
Supplement: pbio.2004830.s016.pdf [file pbio.2004830.s016.pdf]

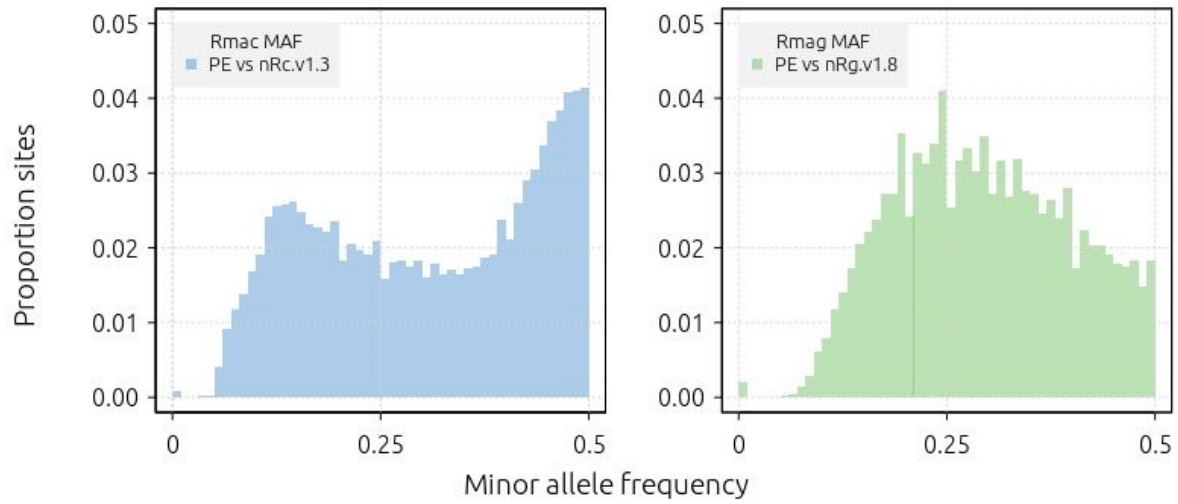

**S7 Fig. MAF distributions for paired-end *Rotaria* sequence data.** A high proportion of low frequency alleles is evident in both mappings, likely caused by population structure in the polyclonal samples (multiple wild-caught individuals) from which these data are derived—the mode at 0.5 is clearer in *R. macrura* as this sample consisted of fewer clones.
