# Supplementary material for: Comparative genomics of bdelloid rotifers: Insights from desiccating and nondesiccating species
Source: PubMed Central journal article supplement (PMC5916493; doi:10.1371/journal.pbio.2004830), 2018-04-24
Supplement: pbio.2004830.s021.pdf [file pbio.2004830.s021.pdf]

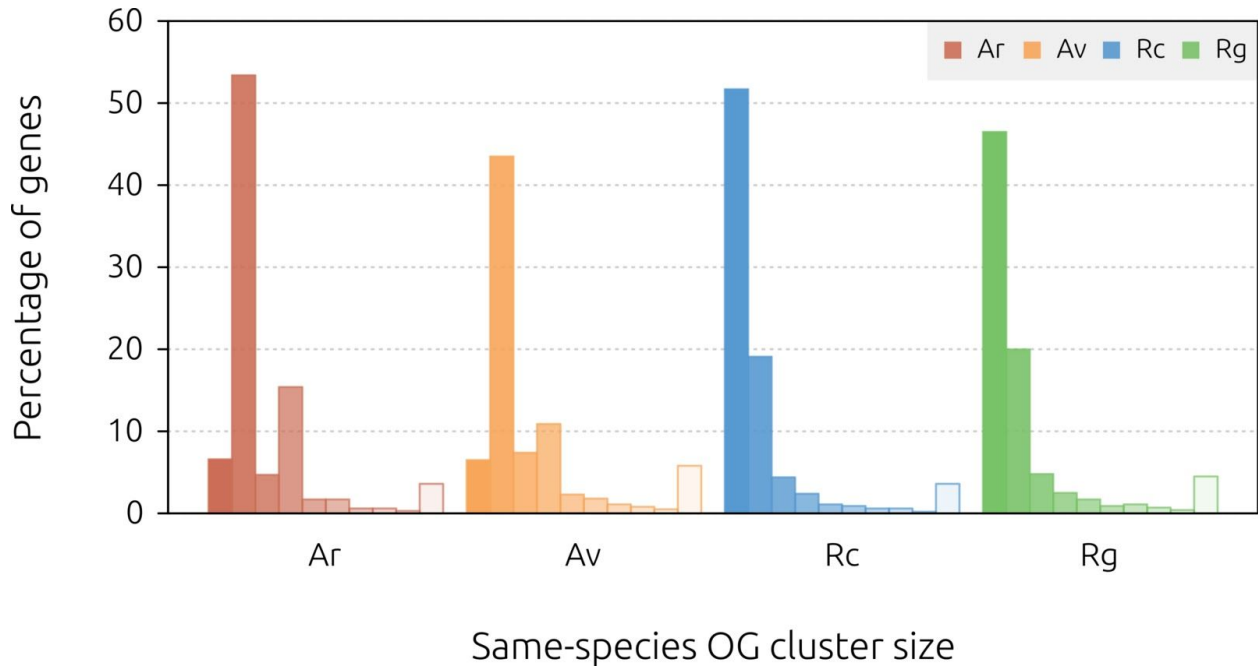

**S12 Fig. Orthologous clustering within bdelloid genomes.** Bars show the distribution of same-species co-orthologous cluster size, expressed as a proportion of each species genome (total number of CDS). Membership size ranges from one (i.e., singletons, left-hand bar) to 10+ (i.e., 10 co-orthologs from the same species, or more; right-hand bar).
