# Supplementary material for: Comparative genomics of bdelloid rotifers: Insights from desiccating and nondesiccating species
Source: PubMed Central journal article supplement (PMC5916493; doi:10.1371/journal.pbio.2004830), 2018-04-24
Supplement: pbio.2004830.s022.pdf [file pbio.2004830.s022.pdf]

**(A)**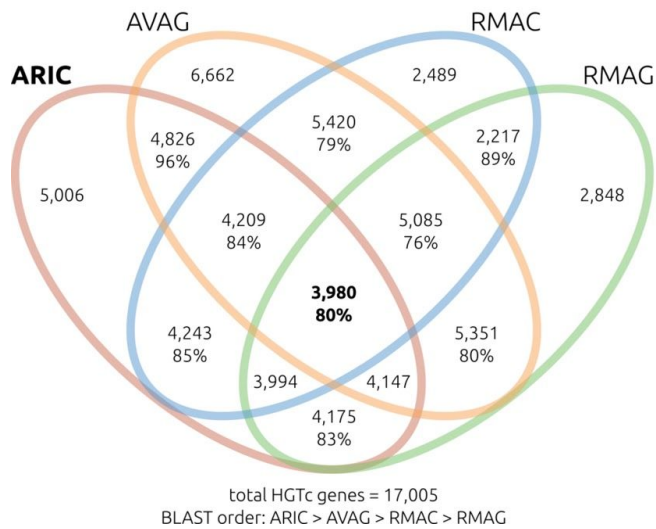**(B)**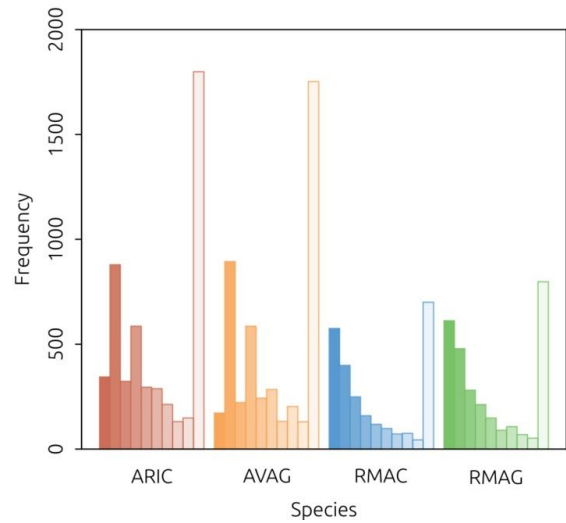

**S13 Fig. Evidence for ancient origin for most HGT<sub>C</sub> genes in bdelloids.** (A). Sequential BLAST analysis of HGT<sub>C</sub> genes. Values within overlapping segments represent the number/proportion HGT<sub>C</sub> present in each set, based on TBLASTN analysis ( $E$ -value  $\leq 1e-5$ , accepting hits showing  $\geq 60\%$  query coverage). All values are relative, based on the order *A. ricciae* (ARIC) > *A. vaga* (AVAG) > *R. macrura* (RMAC) > *R. magnacalcarata* (RMAG). Thus, 3,980 (80%) of *A. ricciae* HGT<sub>C</sub> genes are found in all four species; 5,085 (76%) of *A. vaga* HGT<sub>C</sub> genes are found in *R. macrura* and *R. magnacalcarata*, etc. (B) OG membership distribution for HGT<sub>C</sub> genes. For each species, bars from left to right represent the number of co-orthologous genes for HGT<sub>C</sub> genes (based on BLASTP hits showing  $\geq 60\%$  query coverage as above). The shape of each distribution reflects that of all genes (S12 Fig), except many HGT<sub>C</sub> genes show 10+ hits to other proteins, suggesting that some HGT<sub>C</sub> genes may have undergone substantial duplication after domestication.
