# Supplementary material for: Comparative genomics of bdelloid rotifers: Insights from desiccating and nondesiccating species
Source: PubMed Central journal article supplement (PMC5916493; doi:10.1371/journal.pbio.2004830), 2018-04-24
Supplement: pbio.2004830.s023.pdf [file pbio.2004830.s023.pdf]

**SI Table.** Data counts and accession numbers for sequence data used in this study.

| Library name | Type         | Read length | Insert size <sup>1</sup> | Number of read pairs (raw) | Number of read pairs (trimmed) | Number of bases (trimmed) | SRA accession             |
|--------------|--------------|-------------|--------------------------|----------------------------|--------------------------------|---------------------------|---------------------------|
| Aricci-PE    | Short insert | 100         | 250                      | 190,627,875                | 131,683,730<br>(69.1%)         | 25,059,995,220<br>(65.7%) | ERR2135445                |
| Aricci-MPI   | Mate pair    | 51          | 3,000                    | 137,584,511                | 124,345,538<br>(90.4%)         | 12,516,000,993<br>(89.2%) | ERR2135446                |
| Aricci-MP2   | Mate pair    | 51          | 3,000                    | 71,764,090                 | 67,858,702<br>(94.6%)          | 6,870,775,400<br>(93.9%)  | ERR2135447                |
| Aricci-RNA   | RNA-Seq      | 150         | 250                      | 125,096,118                | 94,033,091<br>(75.2%)          | 26,923,625,245<br>(71.7%) | ERR2135448                |
| Aricci-PB    | PacBio       | 3,618 (N50) | NA                       | NA                         | 196,704                        | 505,466,108               | ERR2135450                |
| Rmacru-PE    | Short insert | 150         | 500                      | 191,998,065                | 173,358,788<br>(90.3%)         | 46,402,883,364<br>(80.6%) | ERR2135453                |
| Rmacru-MP    | Mate pair    | 150         | 2,000                    | 91,593,889                 | 67,854,215<br>(74.1%)          | 17,075,922,666<br>(62.1%) | ERR2135454,<br>ERR2135455 |
| Rmagna-PE    | Short insert | 150         | 550                      | 162,142,774                | 61,225,674<br>(37.8%)          | 18,344,371,056<br>(37.7%) | ERR2135451                |
| Rmagna-MP    | Mate pair    | 150         | 2,000                    | 15,885,056                 | 11,443,087<br>(72.0%)          | 2,379,670,216<br>(49.9%)  | ERR2135452                |

<sup>1</sup> Based on library preparation.
