# Supplementary material for: Comparative genomics of bdelloid rotifers: Insights from desiccating and nondesiccating species
Source: PubMed Central journal article supplement (PMC5916493; doi:10.1371/journal.pbio.2004830), 2018-04-24
Supplement: pbio.2004830.s024.pdf [file pbio.2004830.s024.pdf]

**S2 Table.** MCScanX collinearity metrics within genomes.

| Species                               | <i>A. ricciae</i> | <i>A. vaga</i> | <i>A. vaga</i><br>(collapsed) | <i>R. macrura</i> | <i>R. magnacalcarata</i> |
|---------------------------------------|-------------------|----------------|-------------------------------|-------------------|--------------------------|
| Genes <sup>1</sup>                    | 49857             | 57431          | 35424                         | 24594             | 29359                    |
| Assembly N50 (kb)                     | 277               | 260            | 27                            | 73                | 53                       |
| Singletons (% genes)                  | 1613 (3.2%)       | 1246 (2.2%)    | 7583 (21.4%)                  | 4704 (19.1%)      | 6029 (20.5%)             |
| Dispersed duplicates (%)              | 9153 (18.4%)      | 15198 (26.5%)  | 23418 (66.1%)                 | 16090 (65.5%)     | 19149 (65.2%)            |
| Proximal duplicates (%)               | 588 (1.2%)        | 779 (1.4%)     | 252 (0.7%)                    | 181 (0.7%)        | 265 (0.9%)               |
| Tandem duplicates (%)                 | 1139 (2.3%)       | 1206 (2.1%)    | 1173 (3.3%)                   | 717 (2.9%)        | 920 (3.1%)               |
| Segmental duplicates <sup>2</sup> (%) | 37342 (74.9%)     | 38961 (67.9%)  | 2998 (8.5%)                   | 2881 (11.7%)      | 2988 (10.2%)             |
| Of which form homologous blocks (%)   | 36595 (73.4%)     | 37061 (64.5%)  | 0                             | 0                 | 0                        |
| Of which form ohnologous blocks (%)   | 17051 (34.2%)     | 15740 (27.4%)  | 2998 (8.5%)                   | 2881 (100%)       | 2988 (100%)              |
| Total # blocks                        |                   |                |                               |                   |                          |
| Homologous                            | 475               | 905            | 0                             | 0                 | 0                        |
| Ohnologous                            | 903               | 923            | 184                           | 175               | 187                      |
| Median block size (# genes)           |                   |                |                               |                   |                          |
| Homologous                            | 24                | 13             | NA                            | NA                | NA                       |
| Ohnologous                            | 11                | 9              | 5                             | 11                | 12                       |

<sup>1</sup>Curated gene sets for reference genomes were used in this analysis (see Table 1); <sup>2</sup>Total genes forming collinear blocks. Note that the a gene may contribute to multiple collinear blocks. Homologous blocks defined as those with an average pairwise  $K_s \leq 0.5$  (*A. ricciae*) and  $K_s \leq 0.3$  (*A. vaga*); ohnologous blocks defined as those with an average pairwise  $K_s > 0.5$  (*A. ricciae*),  $K_s > 0.3$  (*A. vaga*), and  $K_s > 0.4$  for both *R. macrura* and *R. magnacalcarata*.
