# Supplementary material for: Comparative genomics of bdelloid rotifers: Insights from desiccating and nondesiccating species
Source: PubMed Central journal article supplement (PMC5916493; doi:10.1371/journal.pbio.2004830), 2018-04-24
Supplement: pbio.2004830.s025.pdf [file pbio.2004830.s025.pdf]

**S3 Table.** Homologous and ohnologous  $K_A$  and  $K_S$ .

|          |        | Homologous blocks <sup>1</sup> |                | Ohnologous blocks |                |                   |                          |
|----------|--------|--------------------------------|----------------|-------------------|----------------|-------------------|--------------------------|
| $K_A$    |        | <i>A. ricciae</i>              | <i>A. vaga</i> | <i>A. ricciae</i> | <i>A. vaga</i> | <i>R. macrura</i> | <i>R. magnacalcarata</i> |
| N blocks |        | 475                            | 905            | 903               | 923            | 175               | 187                      |
|          | Min    | 0.000                          | 0.001          | 0.142             | 0.134          | 0.169             | 0.111                    |
|          | Median | 0.029                          | 0.023          | 0.324             | 0.322          | 0.318             | 0.279                    |
|          | Max    | 0.268                          | 0.332          | 0.675             | 0.838          | 0.601             | 0.621                    |
|          | Mean   | 0.036                          | 0.032          | 0.332             | 0.333          | 0.333             | 0.292                    |
|          | Stddev | 0.026                          | 0.034          | 0.066             | 0.082          | 0.086             | 0.083                    |
|          | Stderr | 0.001                          | 0.001          | 0.002             | 0.003          | 0.007             | 0.006                    |
| $K_S$    |        | <i>A. ricciae</i>              | <i>A. vaga</i> | <i>A. ricciae</i> | <i>A. vaga</i> | <i>R. macrura</i> | <i>R. magnacalcarata</i> |
|          | Min    | 0.000                          | 0.003          | 0.695             | 0.369          | 0.537             | 0.467                    |
|          | Median | 0.132                          | 0.041          | 1.273             | 0.616          | 0.705             | 0.698                    |
|          | Max    | 0.403                          | 0.297          | 1.809             | 0.807          | 0.947             | 0.898                    |
|          | Mean   | 0.135                          | 0.048          | 1.267             | 0.613          | 0.696             | 0.699                    |
|          | Stddev | 0.036                          | 0.026          | 0.146             | 0.062          | 0.080             | 0.078                    |

|                             |                          |                       |                          |                       |                          |                                 |       |
|-----------------------------|--------------------------|-----------------------|--------------------------|-----------------------|--------------------------|---------------------------------|-------|
|                             | Stderr                   | 0.002                 | 0.001                    | 0.005                 | 0.002                    | 0.006                           | 0.006 |
| <b><math>K_A/K_S</math></b> | <b><i>A. ricciae</i></b> | <b><i>A. vaga</i></b> | <b><i>A. ricciae</i></b> | <b><i>A. vaga</i></b> | <b><i>R. macrura</i></b> | <b><i>R. magnacalcarata</i></b> |       |
|                             | 0.267                    | 0.667                 | 0.262                    | 0.543                 | 0.478                    | 0.418                           |       |

<sup>1</sup>Homologous blocks defined as those with an average pairwise  $K_S \leq 0.5$  (*A. ricciae*) and  $K_S \leq 0.3$  (*A. vaga*); ohnologous blocks defined as those with an average pairwise  $K_S > 0.5$  (*A. ricciae*),  $K_S > 0.3$  (*A. vaga*).
