# Supplementary material for: Comparative genomics of bdelloid rotifers: Insights from desiccating and nondesiccating species
Source: PubMed Central journal article supplement (PMC5916493; doi:10.1371/journal.pbio.2004830), 2018-04-24
Supplement: pbio.2004830.s026.pdf [file pbio.2004830.s026.pdf]

**S4 Table.** Species included in comparative analysis.

| Species name                   | Common name         | Phylum       | Genome span (Mb) | Scaffold N50 (kb) | Number of genes <sup>1</sup> | Accession           |
|--------------------------------|---------------------|--------------|------------------|-------------------|------------------------------|---------------------|
| <i>Aplysia californica</i>     | California sea hare | Mollusca     | 927.3            | 91.7 kb           | 21,312                       | GCA_000002075.2 [1] |
| <i>Biomphalaria glabrata</i>   | Freshwater snail    | Mollusca     | 916.4            | 48.1 kb           | 28,551                       | GCA_000457365.1 [2] |
| <i>Caenorhabditis elegans</i>  | Roundworm           | Nematoda     | 100.3            | 17.5 kb           | 20,222                       | GCF_000002985.6 [3] |
| <i>Capitella teleta</i>        | Annelid worm        | Annelida     | 333.3            | 188.4 kb          | 32,175                       | GCA_000328365.1 [4] |
| <i>Crassostrea gigas</i>       | Pacific oyster      | Mollusca     | 557.7            | 401.7 kb          | 26,101                       | GCA_000297895.1 [5] |
| <i>Drosophila melanogaster</i> | Fruit fly           | Arthropoda   | 143.7            | 25,286.9 kb       | 13,931                       | GCA_000001215.4 [6] |
| <i>Helobdella robusta</i>      | Leech               | Annelida     | 235.4            | 3,060.2 kb        | 23,432                       | GCA_000326865.1 [4] |
| <i>Intoshia linei</i>          | NA                  | Orthonectida | 41.6             | 26.3 kb           | 8,724                        | GCA_001642005.1 [7] |
| <i>Lingula anatina</i>         | Lampshell           | Brachiopoda  | 425.5            | 294.5 kb          | 34,105                       | GCA_001039355.1 [8] |
| <i>Lottia gigantea</i>         | Owl limpet          | Mollusca     | 359.5            | 1,870.1 kb        | 23,349                       | GCA_000327385.1 [4] |

|                                  |             |                 |        |          |        |                      |
|----------------------------------|-------------|-----------------|--------|----------|--------|----------------------|
| <i>Octopus bimaculoides</i>      | Octopus     | Mollusca        | 2338.2 | 475.2 kb | 33,609 | GCA_001194135.1 [9]  |
| <i>Ramazzottius varieornatus</i> | Water bear  | Tardigrada      | 55.8   | 474.0 kb | 19,521 | GCA_001949185.1 [10] |
| <i>Schistosoma haematobium</i>   | Blood fluke | Platyhelminthes | 375.9  | 317.5 kb | 13,073 | GCA_000699445.1 [11] |

<sup>1</sup>Inferred from Ensembl Metazoa or the literature.

## References

1. Broad Institute [Internet]. [cited 2016]. Available: <https://www.broadinstitute.org/aplysia/aplysia-genome-project>
2. Adema CM, Hillier LW, Jones CS, Loker ES, Knight M, Minx P, et al. Whole genome analysis of a schistosomiasis-transmitting freshwater snail. *Nat Commun.* 2017;8: 15451.
3. C. elegans Sequencing Consortium. Genome sequence of the nematode *C. elegans*: a platform for investigating biology. *Science.* 1998;282: 2012–2018.
4. Simakov O, Marletaz F, Cho S-J, Edsinger-Gonzales E, Havlak P, Hellsten U, et al. Insights into bilaterian evolution from three spiralian genomes. *Nature.* 2013;493: 526–531.
5. Zhang G, Fang X, Guo X, Li L, Luo R, Xu F, et al. The oyster genome reveals stress adaptation and complexity of shell formation. *Nature.* 2012;490: 49–54.
6. Adams MD, Celniker SE, Holt RA, Evans CA, Gocayne JD, Amanatides PG, et al. The genome sequence of *Drosophila melanogaster*. *Science.* 2000;287: 2185–2195.
7. Mikhailov KV, Slyusarev GS, Nikitin MA, Logacheva MD, Penin AA, Aleoshin VV, et al. The Genome of *Intoshia linei* Affirms Orthonectids as Highly Simplified Spiralians. *Curr Biol.* 2016;26: 1768–1774.
8. Luo Y-J, Takeuchi T, Koyanagi R, Yamada L, Kanda M, Khalturina M, et al. The *Lingula* genome provides insights into brachiopod evolution and the origin of phosphate biomineralization. *Nat Commun.* 2015;6: 8301.
9. Albertin CB, Simakov O, Mitros T, Wang ZY, Pungor JR, Edsinger-Gonzales E, et al. The octopus genome and the evolution of cephalopod neural and morphological novelties. *Nature.* 2015;524: 220–224.
10. Hashimoto T, Horikawa DD, Saito Y, Kuwahara H, Kozuka-Hata H, Shin-I T, et al. Extremotolerant tardigrade genome and improved radiotolerance of human cultured cells by tardigrade-unique protein. *Nat Commun.* 2016;7: 12808.
11. Young ND, Jex AR, Li B, Liu S, Yang L, Xiong Z, et al. Whole-genome sequence of *Schistosoma haematobium*. *Nat Genet.* 2012;44: 221–225.

15. Young ND, Jex AR, Li B, Liu S, Yang L, Xiong Z, et al. Whole-genome sequence of *Schistosoma haematobium*. *Nat Genet.* 2012;44: 221–225.
