# Supplementary material for: Comparative genomics of bdelloid rotifers: Insights from desiccating and nondesiccating species
Source: PubMed Central journal article supplement (PMC5916493; doi:10.1371/journal.pbio.2004830), 2018-04-24
Supplement: pbio.2004830.s027.pdf [file pbio.2004830.s027.pdf]

**S5 Table.** OrthoFinder clustering metrics.

|                                                | <b>Bdelloidea</b> | <b>Protostomia</b> |
|------------------------------------------------|-------------------|--------------------|
| Number of genes in analysis (total)            | 161,241           | 519,293            |
| Number of genes assigned to OGs                | 135,735 (84.2%)   | 440,684 (84.9%)    |
| Number of unassigned genes                     | 25,506 (15.8%)    | 78,609 (15.1%)     |
| Number of OGs (total)                          | 22,377            | 24,931             |
| Number of species-specific OGs <sup>1</sup>    | 137               | 1,510              |
| Number of genes in species-specific OGs        | 418 (0.3%)        | 9,342 (1.8%)       |
| Mean OG size                                   | 6.1               | 17.7               |
| Median OG size                                 | 6                 | 7                  |
| G50 <sup>2</sup> (assigned genes)              | 6                 | 33                 |
| G50 (all genes)                                | 6                 | 27                 |
| O50 <sup>3</sup> (assigned genes)              | 7,077             | 2,814              |
| O50 (all genes)                                | 9,204             | 4,148              |
| Number of orthogroups with all species present | 11,930 (53.3%)    | 1,894 (7.6%)       |
| Number of single-copy orthogroups              | 104 (0.5%)        | 0                  |

<sup>1</sup>An orthogroup containing only conspecific genes; <sup>2</sup>Cluster size at which 50% of genes are in an OG of that size or greater; <sup>3</sup>Fewest number of OGs required to reach G50.
