# Supplementary material for: Comparative genomics of bdelloid rotifers: Insights from desiccating and nondesiccating species
Source: PubMed Central journal article supplement (PMC5916493; doi:10.1371/journal.pbio.2004830), 2018-04-24
Supplement: pbio.2004830.s028.pdf [file pbio.2004830.s028.pdf]

**S6 Table.** OrthoFinder clustering metrics per species.

| <b>BDELLOID CLUSTERING</b>    |                 |                     |                                   |                             |                                             |
|-------------------------------|-----------------|---------------------|-----------------------------------|-----------------------------|---------------------------------------------|
| <b>Species</b>                | <b>Proteins</b> | <b>Assigned (%)</b> | <b>OGs containing species (%)</b> | <b>Species-specific OGs</b> | <b>Proteins in species-specific OGs (%)</b> |
| <i>A. ricciae</i>             | 49,857          | 44,305 (88.9%)      | 19,816 (88.6%)                    | 41                          | 104 (0.2%)                                  |
| <i>A. vaga</i>                | 57,431          | 46,230 (80.5%)      | 19,952 (89.2%)                    | 65                          | 196 (0.3%)                                  |
| <i>R. macrura</i>             | 24,594          | 20,822 (84.7%)      | 15,764 (70.4%)                    | 18                          | 68 (0.3%)                                   |
| <i>R. magnacalcarata</i>      | 29,359          | 24,378 (83%)        | 17,529 (78.3%)                    | 13                          | 50 (0.2%)                                   |
| <b>PROTOSTOMIA CLUSTERING</b> |                 |                     |                                   |                             |                                             |
| <b>Species</b>                | <b>Proteins</b> | <b>Assigned (%)</b> | <b>OGs containing species (%)</b> | <b>Species-specific OGs</b> | <b>Proteins in species-specific OGs (%)</b> |
| <i>A. californica</i>         | 27,591          | 25,169 (91.2%)      | 10,394 (41.7%)                    | 50                          | 219 (0.8%)                                  |
| <i>A. ricciae</i>             | 49,857          | 47,562 (95.4%)      | 14,815 (59.4%)                    | 51                          | 121 (0.2%)                                  |
| <i>A. vaga</i>                | 57,431          | 53,778 (93.6%)      | 15,106 (60.6%)                    | 89                          | 241 (0.4%)                                  |
| <i>B. glabrata</i>            | 36,675          | 31,970 (87.2%)      | 10,594 (42.5%)                    | 90                          | 426 (1.2%)                                  |
| <i>C. elegans</i>             | 28,137          | 16,602 (59%)        | 5,613 (22.5%)                     | 217                         | 1,876 (6.7%)                                |
| <i>C. gigas</i>               | 45,406          | 39,307 (86.6%)      | 10,115 (40.6%)                    | 94                          | 661 (1.5%)                                  |

|                          |        |                |                |     |              |
|--------------------------|--------|----------------|----------------|-----|--------------|
| <i>C. teleta</i>         | 31,978 | 25,781 (80.6%) | 9,802 (39.3%)  | 86  | 757 (2.4%)   |
| <i>D. melanogaster</i>   | 30,482 | 23,640 (77.6%) | 6,286 (25.2%)  | 202 | 873 (2.9%)   |
| <i>H. robusta</i>        | 23,426 | 17,408 (74.3%) | 7,198 (28.9%)  | 50  | 591 (2.5%)   |
| <i>I. linei</i>          | 8,724  | 6,293 (72.1%)  | 4,003 (16.1%)  | 58  | 347 (4%)     |
| <i>L. anatina</i>        | 43,670 | 39,507 (90.5%) | 9,831 (39.4%)  | 179 | 958 (2.2%)   |
| <i>L. gigantea</i>       | 23,822 | 20,400 (85.6%) | 10,003 (40.1%) | 54  | 1,003 (4.2%) |
| <i>O. bimaculoides</i>   | 23,994 | 21,986 (91.6%) | 8,495 (34.1%)  | 78  | 280 (1.2%)   |
| <i>R. macrura</i>        | 24,594 | 23,062 (93.8%) | 12,235 (49.1%) | 16  | 51 (0.2%)    |
| <i>R. magnacalcarata</i> | 29,359 | 27,274 (92.9%) | 13,401 (53.8%) | 14  | 50 (0.2%)    |
| <i>R. varieornatus</i>   | 23,007 | 12,976 (56.4%) | 5,976 (24%)    | 132 | 630 (2.7%)   |
| <i>S. haematobium</i>    | 11,140 | 7,969 (71.5%)  | 5,078 (20.4%)  | 50  | 258 (2.3%)   |
