# Supplementary material for: Comparative genomics of bdelloid rotifers: Insights from desiccating and nondesiccating species
Source: PLoS Biol. 2018 Apr 24;16(4):e2004830. doi: 10.1371/journal.pbio.2004830 (PMC5916493; doi:10.1371/journal.pbio.2004830)
Supplement: S5 Data — SNP, single-nucleotide polymorphism. (XLSX) [file pbio.2004830.s005.xlsx]

## Sheet: SNPs Info
Species	Accession	Mapped	Reference	Span	Span.CDS	Span.CDS.%	Scaffolds.N50	BUSCO.dupRatio	Genes.#	Genes.#.M	SNPs.total	SNPs.HQ.biallelic	SNPs.CDS	SNP.CDS.dens
Adineta ricciae	PE	0.9753	nAv.1.8	174494180	71847191	0.411745	276750	2.11745	55801		137345	29160	103947	0.00144678
	PE	0.961	Platanus uncollapsed	201276416	88005971	0.437239	18700	1.83838	71915		91536	4820	69765	0.00079273
	PE	0.9952	SPAdes	204886070	96247807	0.469763	13038	1.29965	114194		272125	41466	223450	0.00232161
	PE		Velvet k75	180488980		0	38459	1.72509	tbc		130793	15421	NA	NA
Adineta vaga	ERR321927	0.6102	Flot et al, 2013	217933776	80692865	0.370263	260259	2.03691	78800	60469	65017	27680
	ERR321927	0.9481	Platanus collapsed	107347237	45321428	0.422195	27016	1.15488	35285	30944	822482	492579	432634	0.0095459
	ERR321927	0.9435	Platanus uncollapsed	152284720	35176820	0.230994	1040	1.11321	76514	35528	168080	19490	79859	0.00227022
	SRR801084	0.9933	Flot et al, 2013	217933776	80692865	0.370263	260259	2.03691	78800	60469	18866	2927
	SRR801084	0.9453	Platanus collapsed	122313002	46977631	0.384077	12526	1.16781	45494	34055	697406	403693	370276	0.00788196
	SRR801084	0.8499	Platanus uncollapsed	201280899	60662409	0.301382	2113	1.37327	103801	53960	61370	6354	32860	0.000541686
	ERR321927	0.9957	SPAdes	177166173	52582686	0.296799	1680	1.09459	79710	43910	534200	334970	301269	0.00572943
	ERR321927		Velvet k75	185377576		0	1574	1.10053	NA	NA	237543	97477	NA	NA
Rotaria macrura	PE	0.9714	nRc.v1.3	234715442	39984696	0.170354	73242	1.16498	26284	24557	109192	38145	18854	0.00047153
	PE	0.9791	Platanus uncollapsed	295449313	41851666	0.141654	9298	1.13311	38204	27745	46408	468	8652	0.00020673
	MP	0.7816	nRc.v1.3	234715442	39984696	0.170354	73242	1.16498	26284	24557	75518	13938	13115	0.000328
	MP	0.7925	Platanus uncollapsed	295449313	41851666	0.141654	9298	1.13311	38204	27745	6735	358	1494	3.56975e-05
	MP	0.9932	SPAdes	268195603	46840613	0.174651	76873	1.15	32677	27763	103170	39044	19831	0.000423372
	MP		Velvet k75	243209520		0	43304	1.15203	NA	NA	48881	10875	NA	NA
Rotaria magnacalcarata	PE	0.9779	nRg.v1.8	180458959	40274280	0.223177	53250	1.15932	36388	34628	411241	157774	101883	0.00252973
	PE	0.9768	Platanus uncollapsed	337586346	49717159	0.147272	301	1.05344	104726	56159	130335	19472	36594	0.000736044
	MP	0.8298	nRg.v1.8	180458959	40274280	0.223177	53250	1.15932	36388	34628	106786	52907	30158	0.000748815
	MP	0.831	Platanus uncollapsed	337586346	49717159	0.147272	301	1.05344	104726	56159	24508	10661	6884	0.000138463
	MP	0.8419	SPAdes	207150655	53537847	0.258449	22566	1.1661	47577	41609	102507	52588	30668	0.000572828
	MP		Velvet k91	198071839		0	20030	1.16216	NA	NA	92406	46124	NA	NA
