# Supplementary material for: Comparative genomics of bdelloid rotifers: Insights from desiccating and nondesiccating species
Source: PLoS Biol. 2018 Apr 24;16(4):e2004830. doi: 10.1371/journal.pbio.2004830 (PMC5916493; doi:10.1371/journal.pbio.2004830)
Supplement: S7 Data — HGT, horizontal gene transfer. (XLSX) [file pbio.2004830.s007.xlsx]

## Sheet: HGT Protostomia
Species name	Tag	Phylum	Phylum Taxid	Proteins	Hit Uniref90	No hit	No hit (%)	hU>=30	AI>=45	%	HGTc	(%)	HGTc Intronized	(%)	HGTc Linked	(%)	Heavy>95%	HGTc (Intron+Linked)	%	HGTc Clan	(%)	HGTc (Intron+Linked+Clan)	%	HGTc (Linked+Clan)	%	HGTc Mono	(%)	HGTc (Intron+Linked+Mono)	%
Aplysia californica	ACAL	Mollusca	6447	27591	27578	13	0.000471168	336	16	0.000579899	177	0.00641514	136	0.00492914	171	0.00619767	3	133	0.00482041	72	0.00260955	52	0.00188467	70	0.00253706	5	0.000181219	5	0.000181219
Adineta ricciae	ARIC	Rotifera	10190	49857	41525	8332	0.167118	7714	2385	0.0478368	6221	0.124777	3870	0.077622	5614	0.112602	218	3479	0.0697796	5006	0.100407	2714	0.0544357	4530	0.0908599	313	0.00627795	189	0.00379084
Adineta vaga	AVAG	Rotifera	10190	57431	48819	8612	0.149954	10382	3050	0.0531072	8312	0.14473	5220	0.0908917	7067	0.123052	979	3450	0.0600721	6662	0.116	2747	0.0478313	4351	0.0757605	415	0.00722606	190	0.00330832
Biomphalaria glabrata	BGLA	Mollusca	6447	36675	36611	64	0.00174506	540	95	0.00259032	406	0.0110702	245	0.0066803	111	0.00302658	233	92	0.00250852	232	0.00632584	25	0.000681663	31	0.000845262	5	0.000136333	0	0
Caenorhabditis elegans	CELE	Nematoda	6231	28197	28129	68	0.0024116	429	52	0.00184417	318	0.0112778	314	0.0111359	318	0.0112778	0	312	0.011065	181	0.00641912	176	0.0062418	179	0.00634819	3	0.000106394	3	0.000106394
Crassostrea gigas	CGIG	Mollusca	6447	46748	46642	106	0.00226748	487	95	0.00203217	376	0.00804312	258	0.00551895	265	0.00566869	76	241	0.0051553	182	0.00389321	66	0.00141183	83	0.00177548	7	0.000149739	1	2.13913e-05
Capitella teleta	CTEL	Annelida	6340	31978	31881	97	0.00303334	1280	756	0.0236413	1169	0.0365564	226	0.00706736	186	0.0058165	924	121	0.00378385	837	0.0261742	52	0.00162612	84	0.00262681	44	0.00137595	7	0.0002189
Drosophila melanogaster	DMEL	Diptera	7147	30482	30441	41	0.00134506	738	82	0.00269011	356	0.011679	276	0.00905452	356	0.011679	0	276	0.00905452	129	0.00423201	99	0.00324782	129	0.00423201	6	0.000196837	5	0.000164031
Helobdella robusta	HROB	Annelida	6340	23426	23407	19	0.000811065	800	40	0.0017075	388	0.0165628	302	0.0128917	329	0.0140442	48	269	0.011483	208	0.00887902	141	0.00601895	164	0.00700077	6	0.000256126	3	0.000128063
Intoshia linei	ILIN	Orthonectida	33209	8724	8694	30	0.00343879	151	1	0.000114626	114	0.0130674	90	0.0103164	66	0.00756534	18	55	0.00630445	63	0.00722146	32	0.00366804	37	0.00424117	0	0	0	0
Lingula anatina	LANA	Brachiopoda	7574	43670	43662	8	0.000183192	500	44	0.00100756	340	0.00778567	295	0.00675521	304	0.0069613	10	263	0.00602244	34	0.000778567	22	0.000503778	30	0.00068697	0	0	0	0
Lottia gigantea	LGIG	Mollusca	6447	23822	23508	314	0.0131811	386	20	0.00083956	288	0.0120897	167	0.00701033	254	0.0106624	25	152	0.00638066	96	0.00402989	54	0.00226681	85	0.00356813	1	4.1978e-05	0	0
Octopus bimaculoides	OBIM	Mollusca	6447	23994	23986	8	0.000333417	159	7	0.00029174	100	0.00416771	90	0.00375094	66	0.00275069	20	62	0.00258398	43	0.00179211	32	0.00133367	33	0.00137534	0	0	0	0
Rotaria macrura	RMAC	Rotifera	10190	24594	20401	4193	0.170489	4057	1279	0.0520046	3104	0.12621	2913	0.118444	1889	0.0768074	663	1853	0.0753436	2489	0.101204	1495	0.0607872	1523	0.0619257	167	0.00679027	111	0.0045133
Rotaria magnacalcarata	RMAG	Rotifera	10190	29359	23677	5682	0.193535	4490	1142	0.0388978	3443	0.117272	2043	0.0695868	2290	0.0779999	551	1413	0.0481283	2848	0.097006	1124	0.0382847	1902	0.0647842	187	0.00636943	82	0.00279301
Ramazzottius varieornatus	RVAR	Tardigrada	42241	23007	13309	9698	0.421524	400	69	0.00299909	328	0.0142565	248	0.0107793	324	0.0140827	1	245	0.0106489	227	0.00986656	169	0.00734559	223	0.0096927	4	0.00017386	4	0.00017386
Schistosoma haematobium	SHAE	Platyhelminthes	6157	11140	11117	23	0.00206463	139	3	0.0002693	97	0.00870736	64	0.00574506	75	0.0067325	10	53	0.00475763	41	0.00368043	20	0.00179533	29	0.00260323	0	0	0	0
