# Supplementary material for: Comparative genomics of bdelloid rotifers: Insights from desiccating and nondesiccating species
Source: PLoS Biol. 2018 Apr 24;16(4):e2004830. doi: 10.1371/journal.pbio.2004830 (PMC5916493; doi:10.1371/journal.pbio.2004830)
Supplement: S8 Data — (XLSX) [file pbio.2004830.s008.xlsx]

## Sheet: Meiosis Genes
						A. ricciae		A. vaga		R. macrura		R. magnacalcarata		D. melanogaster		C. elegans
OG_Name	Gene	Function	#OG	#Seqs	Synon OG	TBLASTN	HMMER	TBLASTN	HMMER	TBLASTN	HMMER	TBLASTN	HMMER	TBLASTN	HMMER	TBLASTN	HMMER
OG5_129586	SAD1	Bouquet Formation	129586	66		+	+	+	+	+	+	+	+	+	+	+	+
OG5_126834	DMC1	Crossover Regulation	126834	179	RAD51	+	+	+	+	+	+	+	+	+	+	+	+
OG5_127882	MND1	Crossover Regulation	127882	104		/	+	/	+	/	+	/	+	/	+	/	?
OG5_128568	HOP2	Crossover Regulation	128568	87		/	?	/	?	/	+	/	+	/	+	/	?
OG5_128667	HOP1	Crossover Regulation	128667	85		+	+	+	+	/	+	+	+	+	+	+	+
OG5_129379	MSH5	Crossover Regulation	129379	70		+	+	+	+	+	+	+	+	+	+	+	+
OG5_129931	MER3	Crossover Regulation	129931	61		+	+	+	+	+	+	+	+	+	+	+	+
OG5_130077	MSH4	Crossover Regulation	130077	59		+	+	+	+	+	+	+	+	+	+	+	+
OG5_171209	ZIP1	Crossover Regulation	171209	5		/	+	/	+	/	+	/	+	/	+	/	?
OG5_180525	RED1	Crossover Regulation	180525	4		/	/	/	/	/	/	/	/	/	/	/	?
OG5_126706	RAD24	DNA Damage Sensing/Response	126706	215		+	+	+	+	+	+	+	+	+	+	+	+
OG5_127792	RAD50	DNA Damage Sensing/Response	127792	106		+	+	+	+	+	+	+	+	+	+	+	+
OG5_127969	MRE11	DNA Damage Sensing/Response	127969	101		+	+	+	+	+	+	+	+	+	+	+	+
OG5_128386	MEC1/ATR	DNA Damage Sensing/Response	128386	92		+	+	+	+	+	+	+	+	+	+	+	+
OG5_128955	TEL1/ATM	DNA Damage Sensing/Response	128955	79		+	+	+	+	+	+	+	+	+	+	+	+
OG5_130351	RAD23	DNA Damage Sensing/Response	130351	56	MSH3	+	+	+	+	+	+	+	+	+	+	+	+
OG5_127274	SPO11	Double-Strand Break Formation	127274	131		+	+	+	+	+	+	+	+	+	+	+	+
OG5_129086	KU70	Double-Strand Break Repair (Nonhomologous End Joining)	129086	76		+	+	+	+	+	+	+	+	+	+	+	+
OG5_129372	KU80	Double-Strand Break Repair (Nonhomologous End Joining)	129372	70		+	+	+	+	+	+	+	+	+	+	+	+
OG5_130132	LIG4/DNL1	Double-Strand Break Repair (Nonhomologous End Joining)	130132	59		+	+	+	+	+	+	+	+	+	+	+	+
OG5_135131	XRCC4/LIF1	Double-Strand Break Repair (Nonhomologous End Joining)	135131	25		/	+	/	+	/	+	/	+	/	+	/	?
OG5_150817	REC8	Double-Strand Break Repair and Meiotic Divisions	150817	10		/	+	/	+	/	+	/	+	+	+	+	+
OG5_126644	SGS1	Recombinational Repair	126644	253		+	+	+	+	+	+	+	+	+	+	+	+
OG5_126895	MSH6	Recombinational Repair	126895	166		+	+	+	+	+	+	+	+	+	+	+	+
OG5_127098	RAD54	Recombinational Repair	127098	145		+	+	+	+	+	+	+	+	+	+	+	+
OG5_127201	MLH1	Recombinational Repair	127201	136		+	+	+	+	+	+	+	+	+	+	+	+
OG5_127294	RTEL1	Recombinational Repair	127294	129		+	+	+	+	+	+	+	+	+	+	+	+
OG5_127472	FEN1	Recombinational Repair	127472	119		+	+	+	+	+	+	+	+	+	+	+	+
OG5_127511	EXO1	Recombinational Repair	127511	117		+	+	+	+	+	+	+	+	+	+	+	+
OG5_127538	MSH2	Recombinational Repair	127538	116	RAD17	+	+	+	+	+	+	+	+	+	+	+	+
OG5_127751	SMC6	Recombinational Repair	127751	107		+	+	+	+	+	+	+	+	+	+	+	+
OG5_128001	PMS1	Recombinational Repair	128001	101		+	+	+	+	+	+	+	+	+	+	+	+
OG5_128615	SMC5	Recombinational Repair	128615	86		+	+	+	+	+	+	+	+	+	+	+	+
OG5_128649	MPH1/FANCM(a,m)	Recombinational Repair	128649	85		+	+	+	+	+	+	+	+	+	+	+	+
OG5_128732	SLX1	Recombinational Repair	128732	83		+	+	+	+	+	+	+	+	+	+	+	+
OG5_129162	MUS81	Recombinational Repair	129162	75		+	+	+	+	+	+	+	+	+	+	+	+
OG5_129631	DNA2	Recombinational Repair	129631	65		+	+	+	+	+	+	+	+	+	+	+	+
OG5_130552	MLH3	Recombinational Repair	130552	54		+	+	+	+	+	+	+	+	+	+	+	+
OG5_130806	RAD52	Recombinational Repair	130806	51		+	?	+	+	+	?	+	?	/	?	/	?
OG5_131863	BRCA2	Recombinational Repair	131863	41		/	?	/	?	/	/	/	+	/	+	/	/
OG5_135664	MMS4/EME1(s)	Recombinational Repair	135664	23		+	+	+	+	+	+	+	+	+	+	/	+
	BOLD: meiosis-specific genes					+	detected
	See Tekle et al. (2017) Genome Biol Evol. doi:10.1093/gbe/evx002 for further details					/	not detected at any threshold
						?	detected but with E-value below HMMER "inclusion threshold"

## Sheet: Overlapping
ARIC
OG Name		Gene Name
OG5_127538	OG5_129379	MSH2	MSH5
OG5_127538	OG5_126895	MSH2	MSH6
OG5_126895	OG5_130351	MSH6	RAD23
OG5_130351	OG5_129379	RAD23	MSH5
OG5_127201	OG5_130552	MLH1	MLH3
OG5_127201	OG5_130552	MLH1	MLH3
OG5_130552	OG5_127201	MLH3	MLH1
AVAG
OG Name		Gene Name
OG5_129379	OG5_127538	MSH5	MSH2
OG5_130351	OG5_127538	RAD23	MSH2
OG5_126895	OG5_130351	MSH6	RAD23
OG5_126895	OG5_130351	MSH6	RAD23
OG5_129379	OG5_126895	MSH5	MSH6
OG5_130351	OG5_126895	RAD23	MSH6
OG5_127538	OG5_126895	MSH2	MSH6
OG5_127201	OG5_130552	MLH1	MLH3
RMAC
OG Name		Gene Name
OG5_127538	OG5_129379	MSH2	MSH5
OG5_126895	OG5_129379	MSH6	MSH5
OG5_130077	OG5_129379	MSH4	MSH5
OG5_130077	OG5_126895	MSH4	MSH6
OG5_127201	OG5_130552	MLH1	MLH3
OG5_130351	OG5_129379	RAD23	MSH5
OG5_130351	OG5_129379	RAD23	MSH5
RMAG
OG Name		Gene Name
OG5_126895	OG5_127538	MSH6	MSH2
OG5_126895	OG5_127538	MSH6	MSH2
OG5_129379	OG5_127538	MSH5	MSH2
OG5_130351	OG5_126895	RAD23	MSH6
OG5_129379	OG5_126895	MSH5	MSH6
OG5_127201	OG5_130552	MLH1	MLH3
OG Name and Gene Names of all queries with an overlapping hit to another hit (taking top 3 only)
From TBLASTN results
Overlaps detected using Bedtools "intersect"
